# Supplementary material for: circRNA circMED27 acts as a prognostic factor and mediator to promote lenvatinib resistance of hepatocellular carcinoma
Source: PubMed Central journal article supplement — Mol Ther Nucleic Acids. 2021 Dec 9;27:293–303. doi: 10.1016/j.omtn.2021.12.001 (PMC8718824; doi:10.1016/j.omtn.2021.12.001), 2021-12-09
Supplement: mmc1.pdf [file mmc1.pdf]

OMTN, Volume 27

## **Supplemental information**

**circRNA circMED27 acts as a prognostic  
factor and mediator to promote lenvatinib  
resistance of hepatocellular carcinoma**

**Pengfei Zhang, Haixiang Sun, Peihao Wen, Yilin Wang, Yuehong Cui, and Jing Wu**

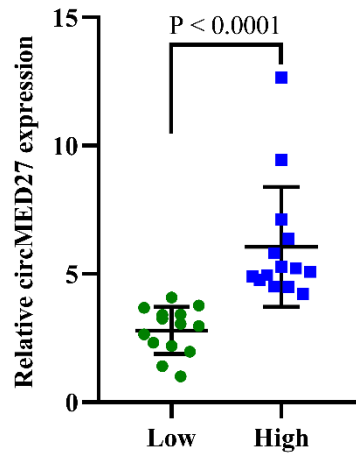

**Figure S1** The expression of circMED27 in HCC patient tissues was verified by RT-qPCR and divided into two groups.
